# Supplementary material for: A network-based analysis of colon cancer splicing changes reveals a tumorigenesis-favoring regulatory pathway emanating from ELK1
Source: HighWire-hosted journal article supplement (doi:10.1101/gr.193169.115), 2016-02-09
Supplement: Supplemental_Material.docx [file Supplemental_Material.docx]

**Supplementary Results**

**Identification of a cancer-associated protein-protein interaction module**

We sought to examine the protein-protein interactions between various splicing factors and the effect those interactions may have on their regulatory function. To this end, we first measured the shortest path length, i.e. network distance, between splicing factors (gene lists were derived from [Chen and Manley 2009](#_ENREF_10) and [Hegele et al. 2012](#_ENREF_20)) in the human proteome network (Supplemental Fig. S1A; Supplementary Methods). Core spliceosomal components displayed a lower mean distance than the mean distance between all human proteins in the network (Student’s *t*-test, *P* < 2.2 x 10-16), indicating that they interact with each other more than random proteins. That is to be expected with elements of large proteomic complexes such as the spliceosome. More surprising was our finding concerning alternative splicing factors, which exhibited a mean distance lower than the mean network distance as well (Student’s *t*-test, *P* < 2.2 x 10-16), suggesting they are highly connected and interact with one another via protein-protein interactions.

This led us to further examine distinct clusters of interacting alternative splicing factors. By applying Markov clustering to an ANAT-inferred ([Yosef et al. 2011](#_ENREF_48)) alternative splicing factor interaction network (Supplementary Methods) we were able to identify a distinct module of interacting proteins that includes a large set of the SR (Ser-Arg) splicing factor family (Supplemental Fig. S1B). Interestingly, the module includes the interactions of thirteen SR proteins and two of their regulators, SRPK1 and SREK1 (SRrp86). This suggests that SRPK1, an SR protein activating kinase ([Zhong et al. 2009](#_ENREF_50)), and SREK1, an SR protein that has been shown to affect the splicing activity of other SR proteins mainly in an inhibitory capacity ([Barnard et al. 2002](#_ENREF_4)), may co-regulate the activity of this module. Moreover, this module includes the oncogenic SRSF1 ([Karni et al. 2007](#_ENREF_26); [Karni et al. 2008](#_ENREF_27)) and it, along with other module members SRPK1, SRSF2, SRSF6, SRSF3, TRA2B, and HNRNPU have been shown to be overexpressed in tumors or involved in tumor driving functional pathways ([Hayes et al. 2007](#_ENREF_19); [Jia et al. 2010](#_ENREF_24); [Amin et al. 2011](#_ENREF_1); [Hope and Murray 2011](#_ENREF_21); [Gout et al. 2012](#_ENREF_17); [Best et al. 2013](#_ENREF_7); [Cohen-Eliav et al. 2013](#_ENREF_13); [Jensen et al. 2014](#_ENREF_23); [Wang et al. 2014](#_ENREF_44)). This regulatory module could therefore play a functional role in tumorigenesis. In addition, using a microarray transcriptomic dataset spanning 48 human tissues and cell lines ([Castle et al. 2008](#_ENREF_9)), we examined the gene expression levels of SR protein module members and *SRPK1* (Supplemental Fig. S1C). Our analysis revealed that *SRSF1* and *SRPK1* exhibit similar gene expression patterns, which are different from those of all other module members. In addition, the two are overexpressed in several cancer cell lines while *SREK1* is not, further indicating towards the antagonistic regulatory effect SREK1 and SRPK1 may have on SR proteins in cancer tissues.

**Several cancer types show similar patterns of alternative splicing and alternative splicing factor gene expression**

As previous studies have shown substantial differences in the splicing profiles of various tumor types compared with their corresponding normal tissues ([Venables et al. 2008](#_ENREF_42); [Liu et al. 2012](#_ENREF_32); [Lin et al. 2013](#_ENREF_31); [Pesson et al. 2014](#_ENREF_40); [Zhang et al. 2014](#_ENREF_49)), we set out to identify cancer-associated splicing profiles. To this end, we analyzed the previously described transcriptomic data pertaining to 48 human tissues and cell lines ([Castle et al. 2008](#_ENREF_9)). Tissues were clustered according to their alternative splicing similarity, computed by the Pearson correlations between vectors of alternative splicing changes (Supplemental Fig. S3A). In agreement with previous studies ([Pan et al. 2008](#_ENREF_39); [Wang et al. 2008](#_ENREF_43); [Barbosa-Morais et al. 2012](#_ENREF_3); [Merkin et al. 2012](#_ENREF_36)), the nervous system tissues exhibit a distinct alternative splicing pattern that is separate from all other tissue types. The heart and skeletal muscles, two tissue types of relatively similar cell type composition, also display similar alternative splicing patterns. Interestingly, our analysis also identified a cluster including tumors and cancer cell lines that is separate from all other non-nervous system tissues, suggesting the existence of a cancerous splicing profile.

Next, a similar approach was applied to cluster tissues according to the gene expression of 58 alternative splicing factors (Supplemental Fig. S3B; gene list was derived from [Chen and Manley 2009](#_ENREF_10) and [Hegele et al. 2012](#_ENREF_20)). Surprisingly, tissue clusters highly resembled those found in Supplemental Fig. S3A. Again, a separate cluster of nervous system tissues as well as a cluster of the heart and skeletal muscles were identified. Furthermore, we observed a cluster of cancer cell lines and one tumor separated from all other non-nervous tissues as well as a cluster of two tumors. These results indicate towards a cancer-associated alternative splicing factor gene expression pattern. In addition, the similarities between the cancerous alternative splicing and gene expression patterns imply that these genes could play a role in bringing forth cancerous alternative splicing programs.

**Differences between colon tumor and normal colon in the splicing of PTBP1-regualted events and *PTBP1* levels do not reflect an epithelial-specific program**

To ensure that the differences observed between colon tumors and the normal tissue are cancer-associated and not due to an epithelial-specific program in the tumors ([Warzecha et al. 2010](#_ENREF_45)), which include a higher concentration of epithelial cells, we examined the splicing patterns of PTBP1-regualted alternative splicing events in two normal human colon epithelium cell lines, CCD 841 CoN and FHC (Supplemental Fig. S5A). In both cell lines the splicing patterns of nine of the eleven tested events are different from those observed in colon tumors and the HCT116 colon cancer cell line, and resemble those observed in normal colon samples and in CT116 cells treated with siRNA targeted against PTBP1 and PTBP2 (Fig. 2C, D; Supplementary Fig. 4A, B). Only the CCD 841 CoN and FHC *CTTN* splicing patterns are similar to those observed in colon tumor samples and untreated HCT116 cells. *SYNE2* splicing patterns resemble neither the splicing profiles of normal colon samples nor those of colon tumor samples. Thus the splicing differences between colon tumors and normal colon are tumor-associated and do not reflect a normal epithelial splicing program.

Moreover, Mallinjoud *et al*. demonstrate that *PTBP1* is less expressed in epithelial cells isolated from different human tissues in comparison with other examined cell types and that its expression is the least correlated with epithelial-included and epithelial-excluded exons, suggesting PTBP1 is not a dominant alternative splicing regulator in normal epithelial cells if at all ([Mallinjoud et al. 2014](#_ENREF_35)). Finally, to assess their relative contribution to alternative splicing regulation specifically in colon cancer, we compared the gene expression of *PTBP1* with that of the epithelial alternative splicing factors *ESRP1* and *ESRP2* ([Warzecha et al. 2009](#_ENREF_46); [Bebee et al. 2015](#_ENREF_5)) in Cancer Genome Atlas data of 207 human colon tumors (The Cancer Genome Research Atlas [Network 2012](#_ENREF_38)) (Supplemental Fig. S5B). We found that mean *PTBP1* levels were significantly higher than those of *ESRP1* and *ESRP2* (two-sided Student's *t*-test, *P* < 2.2 x 10-16). Thus PTBP1 plausibly has a more dominant effect on its RNA targets in colon tumors even should some of them also be regulated by ESRP1/2 in these tumors.

**Supplementary Discussion**

Our analysis revealed PTBP1's role in prompting the cancerous isoforms of alternative splicing events exhibiting a splicing pattern change in colon tumors compared with the normal colon (Fig. 2B). This effect was experimentally validated by the knockdown of *PTBP1* and *PTBP2* (Fig. 2C, D and Supplemental Fig. S4A, B). The low number of these exons associated with PTBP1 CILP-seq tag peaks could be explained by differences in tissue-specific binding of the protein in colon tumors and colon cancer-derived cell lines in comparison with HeLa cells used to produce the CLIP-seq data ([Xue et al. 2009](#_ENREF_47)). Another possible explanation for this discrepancy pertains to a technical limitation of the CLIP experiment as the purified RNA molecules in it only correspond to bound RNAs at the moment of cross-linking ([Kloetgen et al. 2014](#_ENREF_28)). While we cannot rule out the possibility that at least some of the splicing changes presented in Fig. 2C, D and Supplemental Fig. S4A, B result from *PTBP1* and *PTBP2* knockdown secondary effects, several other works have also shown modest overlap between RNAs bound by alternative splicing factors in high throughput CLIP experiments and the splicing changes that result from the knockdown of the same factors in the same cell lines ([Llorian et al. 2010](#_ENREF_33); [Huelga et al. 2012](#_ENREF_22); [Bechara et al. 2013](#_ENREF_6)). Furthermore, a study applying computational models to predict *de novo* PTBP1 targets bound by the protein has revealed and validated a diverse set of PTBP1-regulated exons not marked by CLIP-seq tags as well ([Han et al. 2014](#_ENREF_18)).

*RBFOX2* expression levels were highly correlated with splicing changes of isoforms bound by the protein (Fig.2A). It was not included among the predicted regulators of colon cancer alternative splicing in Fig. 2B, as it did not display a statistically significant expression level change in colon tumors (Methods). *RBFOX2* expression levels were, however, positively correlated with the cancerous isoforms of 8 splicing events included in the analysis (mean *R* = 0.42). 7 of these splicing events were also significantly correlated with *PTBP1* levels, and the *NUMB*, *SLK*, and *CLSTN1* splicing events shown to be regulated by PTBP1 in Fig. 2C Supplemental Fig. S4A had been shown to also be regulated by RBFOX2 ([Lapuk et al. 2010](#_ENREF_30); [Mallinjoud et al. 2014](#_ENREF_35)). This in agreement with the genome-wide co-occurrence of *cis* regulatory sequences associated with the binding of the PTBP1 protein family and the FOX protein family, respectively ([Barash et al. 2010](#_ENREF_2); [Lovci et al. 2013](#_ENREF_34)). *PTBP1* and *RBFOX2* are generally expressed in different normal tissues and cell types, regulating mainly non-overlapping sets of exons ([Castle et al. 2008](#_ENREF_9); [Mallinjoud et al. 2014](#_ENREF_35)), but this could presumably change in cancer due to transcriptional aberrations the genes undergo. Other alternative splicing factors affecting PTBP1 regulatory targets identified in our analyses are RBM10, which decreases *NUMB* exon 9 inclusion, HNRNPA1 and HNRNPA2B1 that induce the cancerous *PKM* isoform ([Chen et al. 2010](#_ENREF_11); [Clower et al. 2010](#_ENREF_12)), and SRSF1, which promotes *RAC1* exon 3b inclusion ([Goncalves et al. 2014](#_ENREF_16)).

**Supplementary Methods**

**Alternative splicing factor protein-protein interaction analysis**

Lists of splicing factors and alternative splicing factors was derived from ([Chen and Manley 2009](#_ENREF_10)) and ([Hegele et al. 2012](#_ENREF_20)). ANAT was used to infer a compact protein-protein network connecting all the alternative splicing factors. Subsequently, all the protein interaction data that intersected with nodes in the inferred network were clustered using Markov CLlustering (MCL) algorithm ([Enright et al. 2002](#_ENREF_14)). Clustering task parameters were used as previously suggested in ([Brohee and van Helden 2006](#_ENREF_8)).

**Chromatin immunoprecipitation**

Approximately 5×107 cells per sample were cross-linked for 10 minutes in 1% formaldehyde. Cross-linking was quenched by the addition of 125 mM glycine. Cells were washed twice with PBS, centrifuged, and pellets were resuspended in Lysis Buffer (1% SDS, 10 mM EDTA, 50 mM Tris-HCl, pH 8.1, complete protease inhibitor cocktail (Roche)). Lysates were sonicated with a Vibra-Cell VCX600 (Sonics & Materials) to obtain an average DNA length of 150-350 bp. After centrifugation at 16,000 g for 8 minutes, the supernatant was diluted 1:10 with Dilution Buffer (0.01% SDS, 1.1% Triton X-100, 1.2 mM EDTA, 16.7 mM Tris-HCl, pH 8.1, 167 mM NaCl, complete protease inhibitor cocktail (Roche)) and aliquoted for IP; chromatin from an equivalent of 15×106 cells was used per IP reaction. Input material was removed for later analysis. Each aliquot was incubated for 16 hours at 4oc with 40μl of either protein-A or G dynabeads (Invitrogen) for pre-clearing. Beads were discarded and pre-cleared aliquots were incubated for 1 hour in room temperature with fresh 40 μl of protein-A/G dynabeads (Invitrogen), previously incubated with 4 μg of the antibody of interest in blocking buffer (PBS, 0.5% TWEEN, 0.5% BSA). The antibodies used are: anti-MYC (sc-40x, Santa Cruz), anti-Elk1 (sc-355, Santa Cruz) and IgG as control. The beads were washed six times with RIPA buffer (0.1% deoxycholate, 0.1% SDS, 1% Triton X-100, 10 mM Tris-HCl, pH 8.1, 1 mM EDTA, 140 mM NaCl), twice with RIPA-high salt buffer (0.1% deoxycholate, 0.1% SDS, 1% Triton X-100, 10 mM Tris-HCl, pH 8.1, 1 mM EDTA, 360 mM NaCl), twice with LiCl wash buffer (250 mM LiCl, 0.5% NP-40 (Sigma 27 IGEPAL), 0.5% deoxycholate, 1 mM EDTA, 10 mM Tris-HCl, pH 8.1) and twice with TE buffer (10 mM Tris-HCl, pH 8.1, 1 mM EDTA). DNA was eluted from the beads with Elution buffer (0.5% SDS, 300 mM NaCl, 5 mM EDTA, 10 mM Tris-HCl, pH 8.1) using a 30-minute incubation in a thermo-shaker at 65oc. From this stage on, input tubes were processed similarly to elution tubes: 1 μl of 10 mg/ml RNase A (Sigma) was added to the supernatant, and samples were incubated for 30 minutes at 37oc; 1.5 μl Proteinase K (NEB) was added and samples were incubated for 16 hours at 65oc. DNA was purified using MinElute PCR purification kit (Qiagen). qPCR was performed aspreviously described. ChIP enrichment relative to input was calculated as 2(CT input - CT antibody).

**Western blotting**

Proteins were extracted by a hypotonic lysis buffer (50 mM Tris-HCl, pH 7.5, 1% NP40, 150 mM NaCl, 0.1% SDS, 0.5% deoxycholic acid, 1 mM EDTA) containing protease inhibitor (Roche) and phosphatase inhibitor cocktails I and II (Sigma). Proteins were separated in a 10% SDS-PAGE and then electroblotted onto a Protran nitrocellulose transfer membrane (Whatman). The following antibodies were used: anti-PTBP1 (ab133734, Abcam), anti-PTBP2 (ABE431, Millipore), anti-MYC (sc-40, Santa Cruz), anti-Actin (MAB1501, Millipore), anti-FLAG M2 (F1804, Sigma).

**Primers**

| **Gene** | **Forward primer** | **Reverse primer** | **Application** |
| --- | --- | --- | --- |
| *ELK1* | AAAAGGATCCATGGACCCATCTGTGACGC | AAAAAAGCTTTCATGGCTTCTGGGGCCC | *ELK1* cDNA cloning |
| *PTBP1* | ATGGACGGCATTGTCCCAGATATAG | CTAGATGGTGGACTTGGAGAAGGAG | *PTBP1* cDNA cloning |
| *RAC1* | TCTGCCAATGTTATGGTAGATG | TTTCAAATGATGCAGGACTCAC | PCR |
| *NUMB* | AAGTAGAAGGGGAGGCAGAG | AGCACCAGAAGATTGACCCC | PCR |
| *NCOR2* | ACGGAGATCTTCAATATGCCC | TTGCAGTCTCCCTCCGAG | PCR |
| *SLK* | GTAAAAAGCGACAATATGACCAG | TCATGAGCTGTTGCTTGTTATTC | PCR |
| *CTTN* | ACTATGTGAAAGGGTTTGGAGG | CTTATCCATCCGATCCTTCTG | PCR |
| *CLSTN1* | TCTGTGATGAGGAATGGCAC | ACAGTCGATCACCTTCTTATC | PCR |
| *ATP2B4* | ATCTCCGCAATACCTACCCG | TGACCTCACCATCCAACAGG | PCR |
| *PKM* | ATGGAGCCGACTGCATCATG | CTTGCACAGCACAGGGAAG | PCR |
| *TPM1* | CGTAAGCTGGTCATCATTGAG | TTCAGCTTGTCGGAAAGGACC | PCR |
| *GAPDH* | TGCACCACCAACTGCTTAG | GGATGCAGGGATGATGTTC | qRT-PCR |
| *HPRT* | TGACACTGGCAAAACAAT | GTCCTTTTCACCAGCAAG | qRT-PCR |
| *ELK1* | GGGCCTTGCGGTACTACTAT | GACCTCAGGGTAGGACACAAA | qRT-PCR |
| *PTBP1* | AGAACGCCCTAGTGCAGATG | ACGTTCTGGTGCTTCGAGA | qRT-PCR |
| *MYC* | TGCTCCATGAGGAGACACC | CCTGCCTCTTTTCCACAGAA | qRT-PCR |
| *AQP8* | GTGGCCAACCACTGGAACT | CCATCTCCAATGAAGCACCT | qRT-PCR |
| *ETS1* | CCGTGGCCTACGCTACTATT | CTGCAGGTCACACACAAAGC | qRT-PCR |
| *KRAS* | GGAGAGAGGCCTGCTGAAAA | AGAAGGCATCATCAACACCC | cDNA amplification for sequencing |
| *PTBP1* promoter  (140bp upstream of TSS) | TGGCGTCTCCCGCAAAGC | TATTGGGGGAGGCGGTTATTC | qPCR following ChIP |
| Intergenic region 11Kbp upstream of *PTBP1* | CCTGGCTAACACGGTGAAAC | TCCCAGGTTCAGGCCATTC | qPCR following ChIP |
| *MYC* promoter (1,070bp upstream of TSS) | TTTGTCCGGGGAGGAAAGAG | CGGACTTCCTAAAAGGGGC | qPCR following ChIP |
| Intergenic region 23.25Kbp downstream of *MYC* | GAGTTTGAGACTAGCCTGACC | TAGCTGGGATTATAGAAGCGC | qPCR following ChIP |

**Supplementary References**

Amin EM, Oltean S, Hua J, Gammons MV, Hamdollah-Zadeh M, Welsh GI, Cheung MK, Ni L, Kase S, Rennel ES et al. 2011. WT1 mutants reveal SRPK1 to be a downstream angiogenesis target by altering VEGF splicing. *Cancer Cell* **20**(6): 768-780.

Barash Y, Calarco JA, Gao W, Pan Q, Wang X, Shai O, Blencowe BJ, Frey BJ. 2010. Deciphering the splicing code. *Nature* **465**(7294): 53-59.

Barbosa-Morais NL, Irimia M, Pan Q, Xiong HY, Gueroussov S, Lee LJ, Slobodeniuc V, Kutter C, Watt S, Colak R et al. 2012. The evolutionary landscape of alternative splicing in vertebrate species. *Science* **338**(6114): 1587-1593.

Barnard DC, Li J, Peng R, Patton JG. 2002. Regulation of alternative splicing by SRrp86 through coactivation and repression of specific SR proteins. *Rna* **8**(4): 526-533.

Bebee TW, Park JW, Sheridan KI, Warzecha CC, Cieply BW, Rohacek AM, Xing Y, Carstens RP. 2015. The splicing regulators Esrp1 and Esrp2 direct an epithelial splicing program essential for mammalian development. *eLife* **4**.

Bechara EG, Sebestyen E, Bernardis I, Eyras E, Valcarcel J. 2013. RBM5, 6, and 10 differentially regulate NUMB alternative splicing to control cancer cell proliferation. *Mol Cell* **52**(5): 720-733.

Best A, Dagliesh C, Ehrmann I, Kheirollahi-Kouhestani M, Tyson-Capper A, Elliott DJ. 2013. Expression of Tra2 beta in Cancer Cells as a Potential Contributory Factor to Neoplasia and Metastasis. *International journal of cell biology* **2013**: 843781.

Brohee S, van Helden J. 2006. Evaluation of clustering algorithms for protein-protein interaction networks. *BMC Bioinformatics* **7**: 488.

Castle JC, Zhang C, Shah JK, Kulkarni AV, Kalsotra A, Cooper TA, Johnson JM. 2008. Expression of 24,426 human alternative splicing events and predicted cis regulation in 48 tissues and cell lines. *Nat Genet* **40**(12): 1416-1425.

Chen M, Manley JL. 2009. Mechanisms of alternative splicing regulation: insights from molecular and genomics approaches. *Nat Rev Mol Cell Biol* **10**(11): 741-754.

Chen M, Zhang J, Manley JL. 2010. Turning on a fuel switch of cancer: hnRNP proteins regulate alternative splicing of pyruvate kinase mRNA. *Cancer Res* **70**(22): 8977-8980.

Clower CV, Chatterjee D, Wang Z, Cantley LC, Vander Heiden MG, Krainer AR. 2010. The alternative splicing repressors hnRNP A1/A2 and PTB influence pyruvate kinase isoform expression and cell metabolism. *Proc Natl Acad Sci U S A* **107**(5): 1894-1899.

Cohen-Eliav M, Golan-Gerstl R, Siegfried Z, Andersen CL, Thorsen K, Orntoft TF, Mu D, Karni R. 2013. The splicing factor SRSF6 is amplified and is an oncoprotein in lung and colon cancers. *J Pathol* **229**(4): 630-639.

Enright AJ, Van Dongen S, Ouzounis CA. 2002. An efficient algorithm for large-scale detection of protein families. *Nucleic Acids Res* **30**(7): 1575-1584.

Forbes SA, Bindal N, Bamford S, Cole C, Kok CY, Beare D, Jia M, Shepherd R, Leung K, Menzies A et al. 2011. COSMIC: mining complete cancer genomes in the Catalogue of Somatic Mutations in Cancer. *Nucleic Acids Res* **39**(Database issue): D945-950.

Goncalves V, Henriques A, Pereira J, Neves Costa A, Moyer MP, Moita LF, Gama-Carvalho M, Matos P, Jordan P. 2014. Phosphorylation of SRSF1 by SRPK1 regulates alternative splicing of tumor-related Rac1b in colorectal cells. *RNA* **20**(4): 474-482.

Gout S, Brambilla E, Boudria A, Drissi R, Lantuejoul S, Gazzeri S, Eymin B. 2012. Abnormal expression of the pre-mRNA splicing regulators SRSF1, SRSF2, SRPK1 and SRPK2 in non small cell lung carcinoma. *PLoS One* **7**(10): e46539.

Han A, Stoilov P, Linares AJ, Zhou Y, Fu XD, Black DL. 2014. De novo prediction of PTBP1 binding and splicing targets reveals unexpected features of its RNA recognition and function. *PLoS Comput Biol* **10**(1): e1003442.

Hayes GM, Carrigan PE, Miller LJ. 2007. Serine-arginine protein kinase 1 overexpression is associated with tumorigenic imbalance in mitogen-activated protein kinase pathways in breast, colonic, and pancreatic carcinomas. *Cancer Res* **67**(5): 2072-2080.

Hegele A, Kamburov A, Grossmann A, Sourlis C, Wowro S, Weimann M, Will CL, Pena V, Luhrmann R, Stelzl U. 2012. Dynamic protein-protein interaction wiring of the human spliceosome. *Mol Cell* **45**(4): 567-580.

Hope NR, Murray GI. 2011. The expression profile of RNA-binding proteins in primary and metastatic colorectal cancer: relationship of heterogeneous nuclear ribonucleoproteins with prognosis. *Human pathology* **42**(3): 393-402.

Huelga SC, Vu AQ, Arnold JD, Liang TY, Liu PP, Yan BY, Donohue JP, Shiue L, Hoon S, Brenner S et al. 2012. Integrative genome-wide analysis reveals cooperative regulation of alternative splicing by hnRNP proteins. *Cell Rep* **1**(2): 167-178.

Jensen MA, Wilkinson JE, Krainer AR. 2014. Splicing factor SRSF6 promotes hyperplasia of sensitized skin. *Nat Struct Mol Biol* **21**(2): 189-197.

Jia R, Li C, McCoy JP, Deng CX, Zheng ZM. 2010. SRp20 is a proto-oncogene critical for cell proliferation and tumor induction and maintenance. *International journal of biological sciences* **6**(7): 806-826.

Kanehisa M, Goto S, Sato Y, Furumichi M, Tanabe M. 2012. KEGG for integration and interpretation of large-scale molecular data sets. *Nucleic Acids Res* **40**(Database issue): D109-114.

Karni R, de Stanchina E, Lowe SW, Sinha R, Mu D, Krainer AR. 2007. The gene encoding the splicing factor SF2/ASF is a proto-oncogene. *Nat Struct Mol Biol* **14**(3): 185-193.

Karni R, Hippo Y, Lowe SW, Krainer AR. 2008. The splicing-factor oncoprotein SF2/ASF activates mTORC1. *Proc Natl Acad Sci U S A* **105**(40): 15323-15327.

Kloetgen A, Munch PC, Borkhardt A, Hoell JI, McHardy AC. 2014. Biochemical and bioinformatic methods for elucidating the role of RNA-protein interactions in posttranscriptional regulation. *Briefings in functional genomics*.

Langer W, Sohler F, Leder G, Beckmann G, Seidel H, Grone J, Hummel M, Sommer A. 2010. Exon array analysis using re-defined probe sets results in reliable identification of alternatively spliced genes in non-small cell lung cancer. *BMC Genomics* **11**: 676.

Lapuk A, Marr H, Jakkula L, Pedro H, Bhattacharya S, Purdom E, Hu Z, Simpson K, Pachter L, Durinck S et al. 2010. Exon-level microarray analyses identify alternative splicing programs in breast cancer. *Mol Cancer Res* **8**(7): 961-974.

Lin KT, Shann YJ, Chau GY, Hsu CN, Huang CY. 2013. Identification of latent biomarkers in hepatocellular carcinoma by ultra-deep whole-transcriptome sequencing. *Oncogene*.

Liu J, Lee W, Jiang Z, Chen Z, Jhunjhunwala S, Haverty PM, Gnad F, Guan Y, H NG, Stinson J et al. 2012. Genome and transcriptome sequencing of lung cancers reveal diverse mutational and splicing events. *Genome Res*.

Llorian M, Schwartz S, Clark TA, Hollander D, Tan LY, Spellman R, Gordon A, Schweitzer AC, de la Grange P, Ast G et al. 2010. Position-dependent alternative splicing activity revealed by global profiling of alternative splicing events regulated by PTB. *Nat Struct Mol Biol* **17**(9): 1114-1123.

Lovci MT, Ghanem D, Marr H, Arnold J, Gee S, Parra M, Liang TY, Stark TJ, Gehman LT, Hoon S et al. 2013. Rbfox proteins regulate alternative mRNA splicing through evolutionarily conserved RNA bridges. *Nat Struct Mol Biol* **20**(12): 1434-1442.

Mallinjoud P, Villemin JP, Mortada H, Polay Espinoza M, Desmet FO, Samaan S, Chautard E, Tranchevent LC, Auboeuf D. 2014. Endothelial, epithelial, and fibroblast cells exhibit specific splicing programs independently of their tissue of origin. *Genome Res* **24**(3): 511-521.

Merkin J, Russell C, Chen P, Burge CB. 2012. Evolutionary dynamics of gene and isoform regulation in Mammalian tissues. *Science* **338**(6114): 1593-1599.

Misquitta-Ali CM, Cheng E, O'Hanlon D, Liu N, McGlade CJ, Tsao MS, Blencowe BJ. 2010. Global profiling and molecular characterization of alternative splicing events misregulated in lung cancer. *Mol Cell Biol* **31**(1): 138-150.

The Cancer Genome Research Atlas Network. 2012. Comprehensive molecular characterization of human colon and rectal cancer. *Nature* **487**(7407): 330-337.

Pan Q, Shai O, Lee LJ, Frey BJ, Blencowe BJ. 2008. Deep surveying of alternative splicing complexity in the human transcriptome by high-throughput sequencing. *Nat Genet* **40**(12): 1413-1415.

Pesson M, Volant A, Uguen A, Trillet K, De La Grange P, Aubry M, Daoulas M, Robaszkiewicz M, Le Gac G, Morel A et al. 2014. A Gene Expression and Pre-mRNA Splicing Signature That Marks the Adenoma-Adenocarcinoma Progression in Colorectal Cancer. *PLoS One* **9**(2): e87761.

Thorsen K, Sorensen KD, Brems-Eskildsen AS, Modin C, Gaustadnes M, Hein AM, Kruhoffer M, Laurberg S, Borre M, Wang K et al. 2008. Alternative splicing in colon, bladder, and prostate cancer identified by exon array analysis. *Mol Cell Proteomics* **7**(7): 1214-1224.

Venables JP, Klinck R, Bramard A, Inkel L, Dufresne-Martin G, Koh C, Gervais-Bird J, Lapointe E, Froehlich U, Durand M et al. 2008. Identification of alternative splicing markers for breast cancer. *Cancer Res* **68**(22): 9525-9531.

Wang ET, Sandberg R, Luo S, Khrebtukova I, Zhang L, Mayr C, Kingsmore SF, Schroth GP, Burge CB. 2008. Alternative isoform regulation in human tissue transcriptomes. *Nature* **456**(7221): 470-476.

Wang P, Zhou Z, Hu A, Ponte de Albuquerque C, Zhou Y, Hong L, Sierecki E, Ajiro M, Kruhlak M, Harris C et al. 2014. Both Decreased and Increased SRPK1 Levels Promote Cancer by Interfering with PHLPP-Mediated Dephosphorylation of Akt. *Mol Cell*.

Warzecha CC, Jiang P, Amirikian K, Dittmar KA, Lu H, Shen S, Guo W, Xing Y, Carstens RP. 2010. An ESRP-regulated splicing programme is abrogated during the epithelial-mesenchymal transition. *EMBO J* **29**(19): 3286-3300.

Warzecha CC, Shen S, Xing Y, Carstens RP. 2009. The epithelial splicing factors ESRP1 and ESRP2 positively and negatively regulate diverse types of alternative splicing events. *RNA biology* **6**(5): 546-562.

Xue Y, Zhou Y, Wu T, Zhu T, Ji X, Kwon YS, Zhang C, Yeo G, Black DL, Sun H et al. 2009. Genome-wide analysis of PTB-RNA interactions reveals a strategy used by the general splicing repressor to modulate exon inclusion or skipping. *Mol Cell* **36**(6): 996-1006.

Yosef N, Zalckvar E, Rubinstein AD, Homilius M, Atias N, Vardi L, Berman I, Zur H, Kimchi A, Ruppin E et al. 2011. ANAT: a tool for constructing and analyzing functional protein networks. *Sci Signal* **4**(196): pl1.

Zhang S, Liu Y, Liu Z, Zhang C, Cao H, Ye Y, Wang S, Zhang Y, Xiao S, Yang P et al. 2014. Transcriptome profiling of a multiple recurrent muscle-invasive urothelial carcinoma of the bladder by deep sequencing. *PLoS One* **9**(3): e91466.

Zhong XY, Ding JH, Adams JA, Ghosh G, Fu XD. 2009. Regulation of SR protein phosphorylation and alternative splicing by modulating kinetic interactions of SRPK1 with molecular chaperones. *Genes Dev* **23**(4): 482-495.

**Supplementary Tables**

**Table S1. KEGG cancer pathway (**[**Kanehisa et al. 2012**](#_ENREF_25)**) and COSMIC gene (**[**Forbes et al. 2011**](#_ENREF_15)**) enrichment in statistically significant constructed subnetworks.**

| Database | Cancer  tissue | Network  origin | Intersecting genes  or proteins | DB annotations | FDR  corrected enrichment  *P* value |
| --- | --- | --- | --- | --- | --- |
| KEGG | Colon | ELK1 | ETS1, MAPK3, MYC | hsa05200, hsa05210, hsa05211, hsa05213, hsa05216, hsa05219, hsa05220, hsa05221 | 0.023 |
| COSMIC | Colon | ELK1 | CUX1, MYC | NA | 0.068 |
| KEGG | Lung | ESR1 | CREBBP, DDX5, EP300,  GRB2, HNRNPK, SRC | hsa05203, hsa05211, hsa05215 | 0.0003 |
| COSMIC | Lung | ESR1 | CREBBP, CUX1, DDX5,  EP300, HNRNPA2B1 | NA | 0.0004 |
| KEGG | Lung | TFAP2A | EP300, ETS1, GRB2,  MYC, TP53, WT1 | hsa05200, hsa05202, hsa05203, hsa05211, hsa05213, hsa05215, hsa05216, hsa05219, hsa05220, hsa05221, hsa05223 | 0.0003 |
| COSMIC | Lung | TFAP2A | EP300, HNRNPA2B1,  MYC, TP53, WT1 | NA | 0.0004 |
| COSMIC | Lung | E2F1 | CREBBP, CUX1,  GATA1, HNRNPA2B1,  RB1 | NA | 0.0002 |
| KEGG | Lung | EGR1 | CREBBP, EP300, GRB2,  SMAD3, TP53 | hsa05200, hsa05203, hsa05210, hsa05211, hsa05213, hsa05215, hsa05220, hsa05223 | 0.002 |
| COSMIC | Lung | EGR1 | CREBBP, CUX1, EP300,  HNRNPA2B1, TOP1,  TP53 | NA | 2.58 x 10-5 |

**Table S2. Colon adenocarcinoma and matched normal colon samples.**

| Patient # | Patient age | Patient gender | Patient country of  origin | Collection date | Diagnosis date |
| --- | --- | --- | --- | --- | --- |
| 1 | 56 | Female | Morocco | Dec. 2009 | Nov. 2009 |
| 2 | 57 | Female | Unknown | Dec. 2009 | Nov. 2009 |
| 3 | 73 | Female | Germany | Dec. 2009 | Oct. 2009 |
| 4 | 83 | Female | Unknown | Jan. 2010 | Dec. 2009 |
| 5 | 70 | Female | Unknown | Apr. 2010 | Apr. 2010 |
| 6 | 67 | Female | Syria | Apr. 2010 | Feb. 2010 |
| 7 | 79 | Female | Syria | Aug. 2010 | Jul. 2010 |
| 8 | 57 | Male | Unknown | Oct. 2010 | Sep. 2010 |
| 9 | 76 | Female | Russia | Apr. 2011 | Unknown |
| 10 | 84 | Female | Jordan | Aug. 2011 | Jul. 2011 |
| 11 | 84 | Male | Bulgaria | Dec. 2011 | Dec. 2011 |
| 12 | 86 | Male | Poland | Dec. 2011 | Dec. 2011 |
| 13 | 66 | Female | Turkey | Jan. 2012 | Nov. 2011 |
| 14 | 79 | Female | Iraq | Apr. 2012 | Feb. 2012 |
| 15 | 60 | Female | Unknown | May 2012 | 2012 |
| 16 | 58 | Female | Russia | May 2012 | Mar. 2012 |
| 17 | 51 | Female | Unknown | May 2012 | 2012 |
| 18 | 66 | Female | Syria | Jul. 2012 | May. 2012 |
| 19 | 62 | Male | Unknown | Jul. 2012 | Jun. 2012 |

**Table S3. Colon adenocarcinoma *KRAS* mutations.**

| Patient # | Chromosome | Position | Strand | Exon | Tumor  allele 1 | Tumor  allele 2 | Normal  allele 1 | Normal  allele 2 |
| --- | --- | --- | --- | --- | --- | --- | --- | --- |
| 1 | chr12 | 25289552 | - | Exon 2 | T | G | G | G |
| 3 | chr12 | 25289548 | - | Exon 2 | A | G | G | G |
| 4 | chr12 | 25289548 | - | Exon 2 | A | G | G | G |
| 5 | chr12 | 25269914 | - | Exon 4 | G | A | A | A |
| 6 | chr12 | 25271543 | - | Exon 3 | G | A | A | A |
| 7 | chr12 | 25269829 | - | Exon 4 | T | G | G | G |
| 8 | chr12 | 25289552 | - | Exon 2 | T | G | G | G |
| 9 | chr12 | 25271521 | - | Exon 3 | A | G | G | G |
| 13 | chr12 | 25289548 | - | Exon 2 | A | G | G | G |
| 14 | chr12 | 25289548 | - | Exon 2 | A | G | G | G |

**Supplementary Figure Legends**

**Figure S1. Identification of a cancer-associated protein-protein interaction module.** (**A**) Mean distances between all proteins (n = 10,186), core spliceosomal components (n = 141), and alternative splicing factors (n = 85) in the human protein-protein interaction network. Boxes enclose values between the first and third quartile. Mean values are marked by an X. (**B**) A distinct protein module identified by applying Markov clustering to the alternative splicing factor protein-protein interaction network (Supplementary Methods). SR proteins are colored in light blue; other proteins are colored in gray. Cancer-associated proteins are marked by red borders. Line thickness represents the relative strength of the protein-protein interaction ([Yosef et al. 2011](#_ENREF_48)). (**C**) Hierarchical clustering of the gene expression of module SR proteins and *SRPK1* in 48 human tissue and cell lines. Cell lines are marked by *. The color key legend includes a histogram of the gene expression level distribution.

**Figure S2. ESR1 lung tumor subnetwork.** The highest ranking lung tumor subnetwork was that of Estrogen Receptor 1 (ESR1). Network gene names of exons exhibiting significant splicing changes in the lung tumor compared with the normal tissue are colored light blue; all other genes and proteins are colored gray. Alternative splicing factors are marked by red borders. Protein-DNA and protein-pre-mRNA interactions are marked by black and red directed arrows, respectively. Protein-protein interactions are marked by black lines.

**Figure S3. Several cancer types show similar patterns of alternative splicing and alternative splicing factor gene expression.** Hierarchical clustering of (**A**) alternative splicing similarity and (**B**) alternative splicing factor gene expression in 48 human tissue and cell lines. Cell lines are marked by *. Alternative splicing similarity was computed by the Pearson correlations between vectors of alternative splicing changes in each tissue. White boxes denote missing reads. The color key legends include a histogram of the distribution of the correlation coefficients (A) and gene expression values (B). Clusters of cancer tissues, nervous system tissues, as well as heart and skeletal muscle are marked by red frames (A, B) and a blue line (A).

**Figure S4. Modulation of PTBP1 and PTBP2 or ELK1 levels in HCT116 cells.** (**A**-**B**) HCT116 cells were treated with either control siRNA (Cont.) or siRNA directed against *PTBP1* and *PTBP2* (*PTBP* KD). Two independent replicates of the results presented in Fig. 2C, D; performed as described there. (**C**-**D**) HCT116 cells were transfected with a plasmid containing cDNA encoding ELK1 (ELK1 OE) or an empty vector. Two independent replicates of the results presented in Fig. 3E, F; performed as described there.

**Figure S5. Analysis of PTBP1-regulated alterative splicing events in normal colon epithelium and *PTBP1*, *ESRP1*, and *ESRP2* levels in colon tumor data.** (**A**) RT-PCR analysis of PTBP1-regulated alternative splicing events in the colon epithelial cell lines CCD 841 CoN and FHC. Total RNA was isolated from the cells. Each diagram depicts exon positions and the possible transcripts arising from the alternative splicing event. *PKM* and *TPM1* RT-PCR products were digested with PstI. (**B**) Mean gene expression levels (RPKM) in 207 human colon cancer samples. Error bars represent the standard errors of the means.

**Figure S6. PTBP1-regulated alternative splicing events in matched normal and tumor colon samples.** Total RNA was isolated from normal colon (N) and matching colon adenocarcinoma (T) samples. Several candidate alternative splicing events in samples from several candidate patients were analyzed by RT-PCR.Patient numbers are derived from Table S2. Each diagram depicts exon positions and the possible transcripts arising from the alternative splicing event. Genes displaying a splicing pattern difference between the normal and the tumor samples, which matches previously published experimental data ([Thorsen et al. 2008](#_ENREF_41); [Langer et al. 2010](#_ENREF_29); [Misquitta-Ali et al. 2010](#_ENREF_37)) and the results in Fig. 2C, are colored blue; genes that do not are colored red.

**Figure S7. *ELK1*, *MYC*, and *PTBP1* expression correlations in different cancers.** Smoothed color density representation of the Pearson correlations between the expression levels (RPKM or log2) of *ELK1* against *PTBP1* (left), *MYC* against *PTBP1* (middle), and *ELK1* against *MYC* (right) in samples of acute myeloid leukemia (n = 179), clear cell renal cell carcinoma (n = 419), breast cancer (n = 179), squamous cell lung cancer (n = 178), glioblastoma (n = 202), and ovarian cancer (n = 489).
