# Supplementary figures and images for: A network-based analysis of colon cancer splicing changes reveals a tumorigenesis-favoring regulatory pathway emanating from ELK1
Source: HighWire-hosted journal article supplement (doi:10.1101/gr.193169.115), 2016-02-09

A

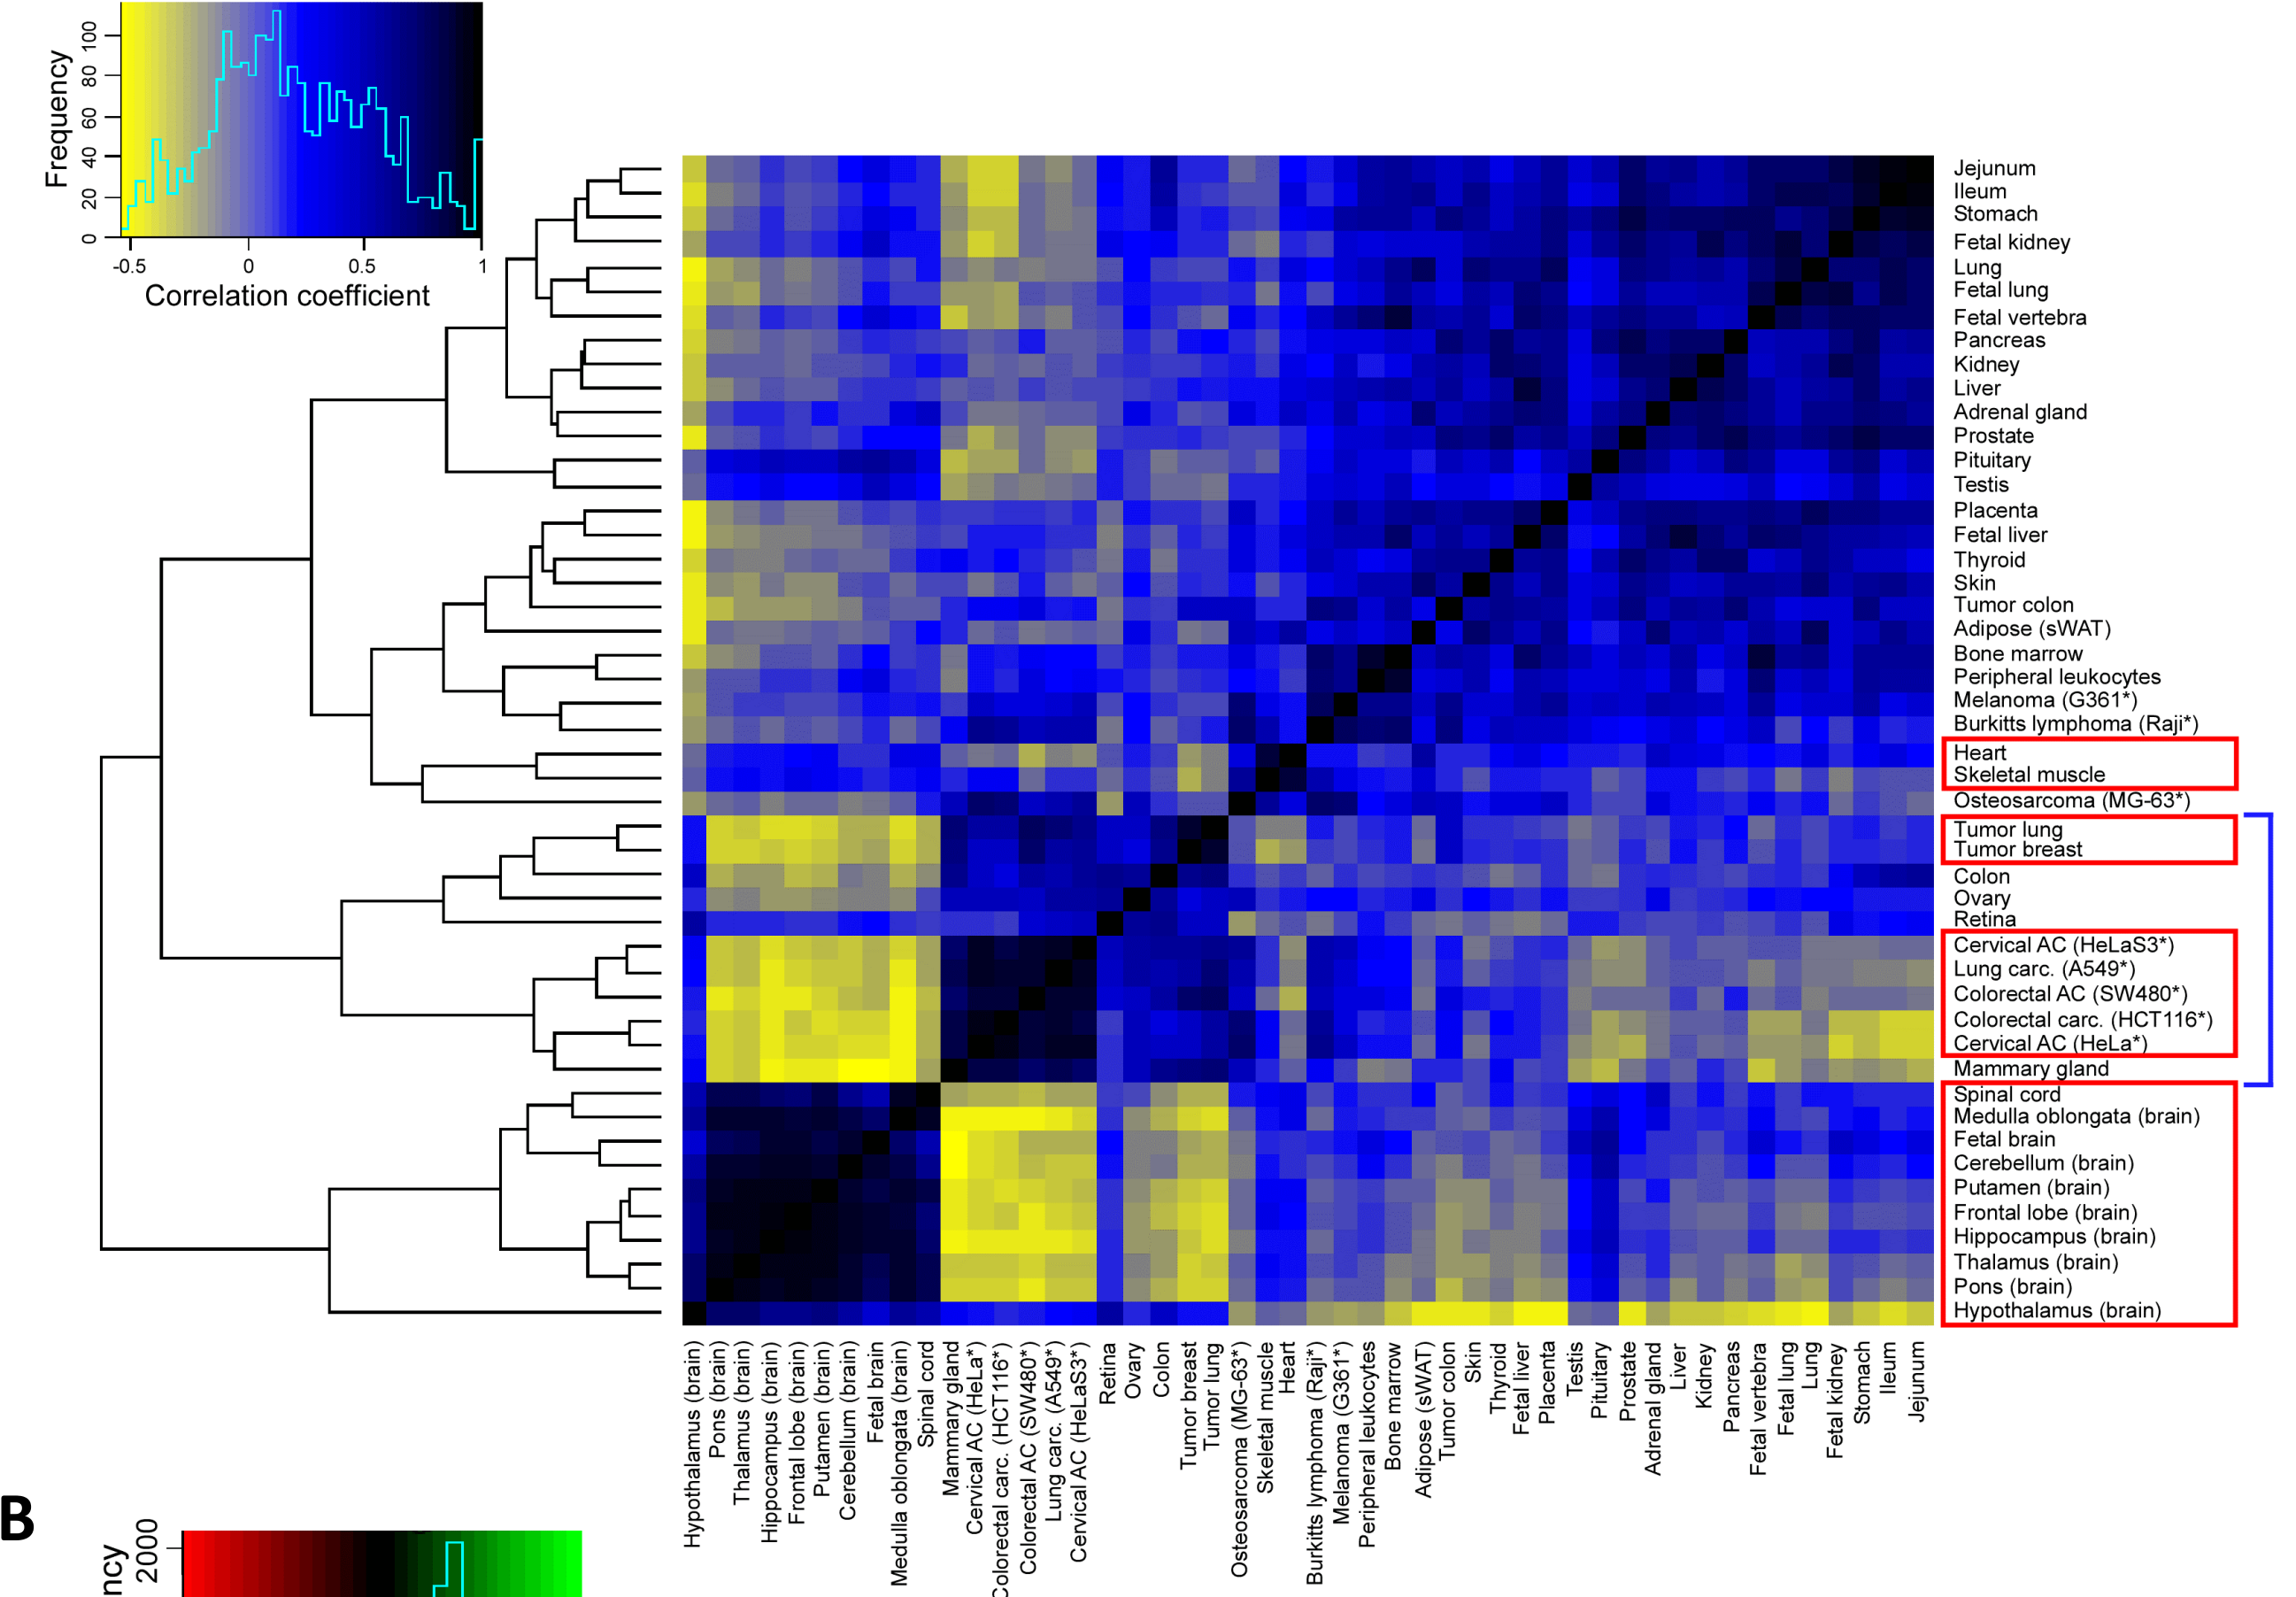

B

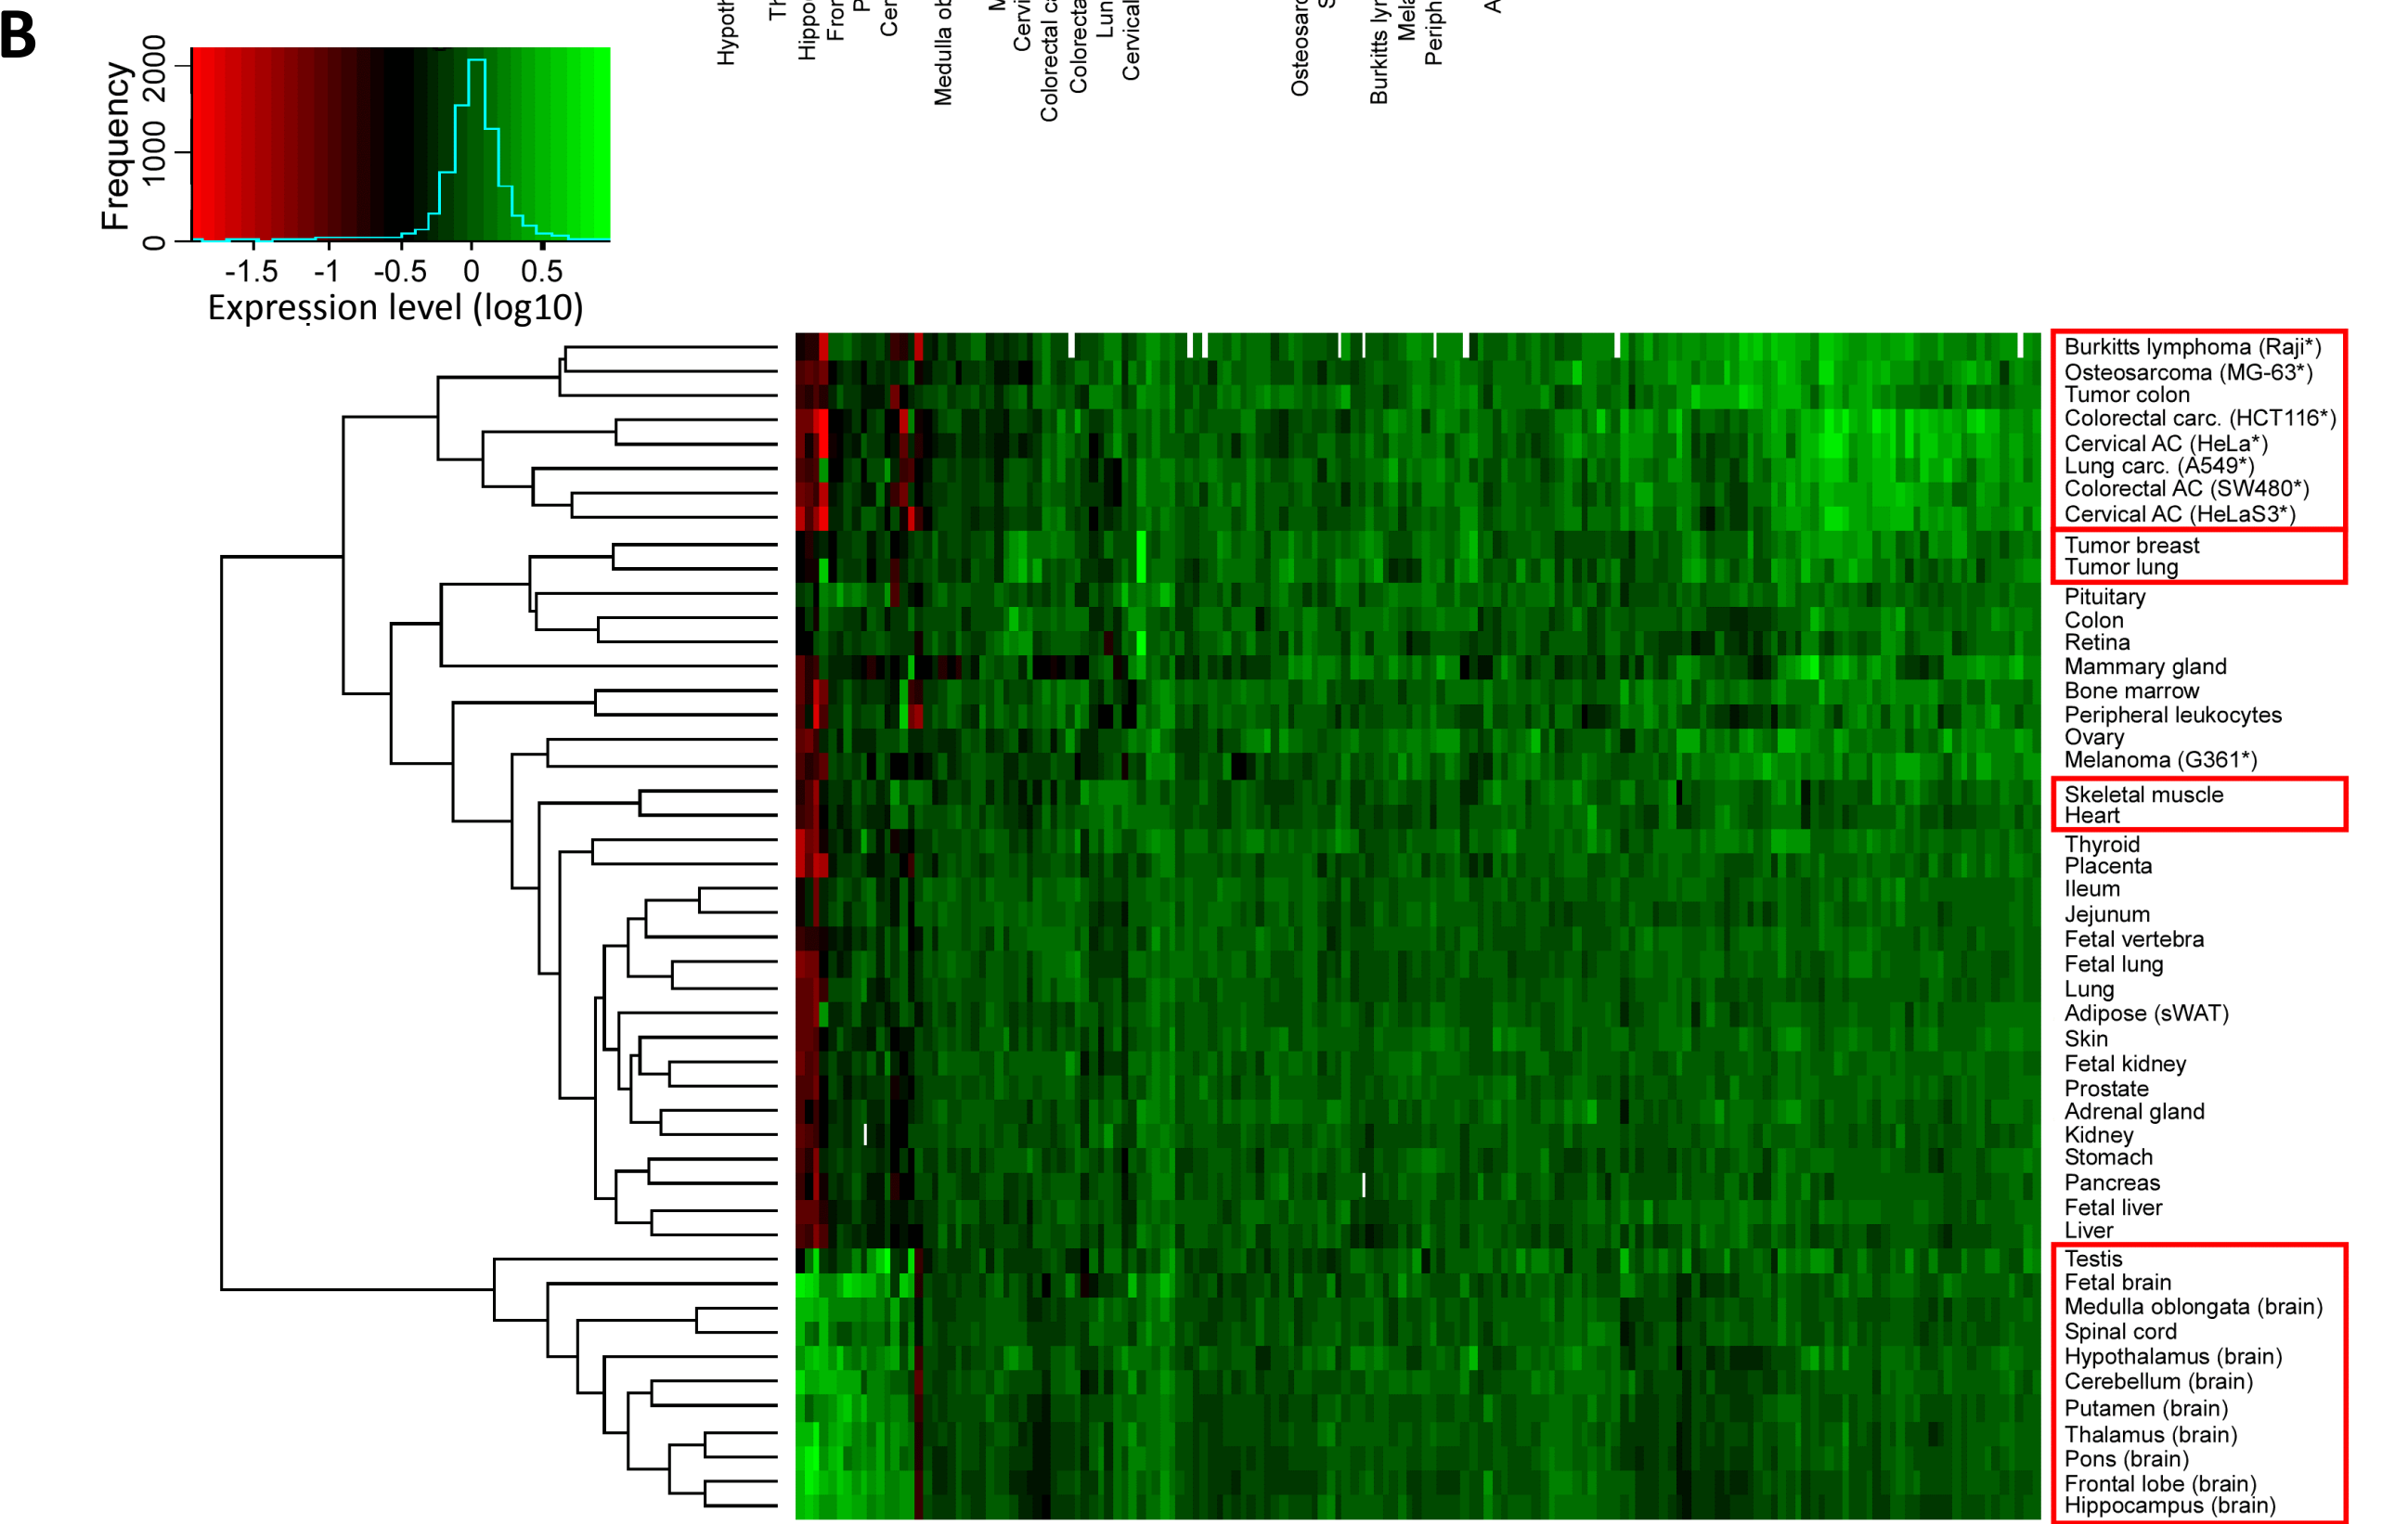

Supplement: FigureS3.pdf [file FigureS3.pdf]
